# Supplementary material
Source: PubMed Central journal article supplement (PMC8209685)
Supplement: NIHMS1709671-supplement-Supplementary_Tables_1-6.pdf [file NIHMS1709671-supplement-Supplementary_Tables_1-6.pdf]

Table 1. 5-6 Year Old Reading Sample Sizes, Standardized Means, and Standard Deviations, Aggregated Biennially from 1986 - 2005

| Year | Poor White |       |      | Non-Poor White |       |      | Poor Black |       |      | Non-Poor Black |       |      | Poor Hispanic |       |      | Non-Poor Hispanic |       |      |
|------|------------|-------|------|----------------|-------|------|------------|-------|------|----------------|-------|------|---------------|-------|------|-------------------|-------|------|
|      | N          | M     | SD   | N              | M     | SD   | N          | M     | SD   | N              | M     | SD   | N             | M     | SD   | N                 | M     | SD   |
| 1986 | 31         | -0.57 | 1.46 | 50             | -0.15 | 0.95 | 83         | -0.37 | 0.97 | 61             | 0.36  | 0.79 | 62            | -0.22 | 0.84 | 160               | 0.32  | 0.94 |
| 1988 | 34         | -0.54 | 1.05 | 64             | -0.16 | 1.00 | 81         | -0.11 | 0.96 | 89             | 0.31  | 1.00 | 76            | -0.34 | 0.96 | 199               | 0.17  | 0.96 |
| 1990 | 30         | -0.70 | 0.74 | 75             | -0.18 | 1.01 | 62         | -0.22 | 0.95 | 83             | 0.24  | 1.01 | 40            | -0.21 | 0.91 | 211               | 0.21  | 1.00 |
| 1992 | 28         | -0.46 | 0.66 | 76             | -0.22 | 0.79 | 46         | -0.25 | 0.80 | 63             | 0.35  | 1.03 | 24            | -0.66 | 0.91 | 187               | 0.17  | 0.93 |
| 1994 | 18         | -0.29 | 1.10 | 73             | -0.12 | 0.93 | 47         | -0.23 | 1.25 | 72             | 0.34  | 0.93 | 24            | -0.63 | 0.92 | 175               | 0.15  | 0.89 |
| 1996 | 19         | -0.73 | 0.98 | 50             | -0.04 | 0.92 | 39         | -0.37 | 0.90 | 38             | 0.16  | 0.77 | 16            | 0.13  | 0.52 | 190               | 0.21  | 1.08 |
| 1998 | 18         | -0.65 | 0.81 | 39             | -0.30 | 1.09 | 27         | -0.79 | 0.86 | 43             | 0.31  | 1.24 | 13            | -0.54 | 0.82 | 143               | 0.22  | 0.86 |
| 2000 | 3          | -1.25 | 1.21 | 18             | 0.26  | 0.81 | 14         | -0.95 | 0.97 | 20             | -0.29 | 0.87 | 15            | 0.25  | 0.86 | 106               | 0.13  | 1.01 |
| 2002 | 3          | 0.19  | 0.40 | 23             | 0.08  | 1.08 | 9          | -0.54 | 0.79 | 23             | 0.11  | 1.02 | 11            | -0.27 | 0.88 | 83                | -0.07 | 0.84 |
| 2004 | 4          | -0.36 | 1.46 | 19             | -0.12 | 0.72 | 7          | -0.28 | 0.87 | 17             | -0.14 | 0.74 | 9             | -0.22 | 0.84 | 64                | 0.09  | 0.98 |
| 2005 | 3          | -1.30 | 1.42 | 14             | -0.07 | 0.83 | 6          | -0.03 | 1.14 | 16             | -0.27 | 1.04 | 7             | -0.34 | 0.96 | 32                | 0.16  | 1.02 |

Table 2. 9-10 Year Old Reading Sample Sizes, Standardized Means, and Standard Deviations, Aggregated Biennially from 1986 - 2005

| Year | Poor White |       |      | Non-Poor White |       |      | Poor Black |       |      | Non-Poor Black |       |      | Poor Hispanic |       |      | Non-Poor Hispanic |       |      |
|------|------------|-------|------|----------------|-------|------|------------|-------|------|----------------|-------|------|---------------|-------|------|-------------------|-------|------|
|      | N          | M     | SD   | N              | M     | SD   | N          | M     | SD   | N              | M     | SD   | N             | M     | SD   | N                 | M     | SD   |
| 1986 | 13         | -0.22 | 0.97 | 12             | 0.17  | 0.69 | 44         | -0.36 | 0.92 | 33             | -0.11 | 0.68 | 29            | -0.44 | 0.84 | 56                | 0.14  | 0.86 |
| 1988 | 21         | -0.45 | 0.96 | 30             | -0.03 | 0.79 | 61         | -0.53 | 0.83 | 50             | -0.17 | 0.93 | 39            | -0.22 | 0.85 | 110               | -0.07 | 0.85 |
| 1990 | 25         | -0.56 | 0.87 | 47             | -0.27 | 0.87 | 54         | -0.65 | 0.96 | 76             | -0.03 | 1.02 | 28            | -0.30 | 0.92 | 135               | 0.21  | 0.93 |
| 1992 | 30         | -0.51 | 0.99 | 61             | 0.06  | 0.95 | 62         | -0.50 | 0.78 | 84             | -0.17 | 0.87 | 30            | -0.01 | 1.06 | 151               | 0.11  | 0.90 |
| 1994 | 29         | -0.47 | 1.19 | 72             | -0.19 | 0.84 | 56         | -0.44 | 1.04 | 75             | -0.15 | 0.94 | 37            | 0.03  | 0.92 | 182               | 0.10  | 0.93 |
| 1996 | 24         | -0.60 | 0.88 | 69             | -0.12 | 0.94 | 43         | -0.69 | 0.80 | 65             | -0.11 | 0.94 | 22            | -0.14 | 1.33 | 168               | 0.27  | 0.81 |
| 1998 | 24         | -0.19 | 0.95 | 61             | -0.10 | 1.05 | 45         | -0.68 | 0.85 | 72             | -0.12 | 0.94 | 28            | -0.28 | 1.16 | 153               | 0.25  | 1.00 |
| 2000 | 11         | -0.57 | 1.19 | 28             | 0.25  | 0.92 | 28         | -0.49 | 0.86 | 33             | 0.08  | 1.18 | 21            | 0.29  | 0.60 | 155               | 0.28  | 0.94 |
| 2002 | 12         | -0.71 | 1.28 | 45             | 0.48  | 1.21 | 24         | -0.55 | 1.22 | 42             | 0.11  | 0.94 | 11            | -0.04 | 0.79 | 137               | 0.47  | 0.92 |
| 2004 | 5          | -0.19 | 1.23 | 27             | 0.49  | 0.99 | 18         | -0.82 | 0.92 | 30             | -0.06 | 1.10 | 3             | -0.67 | 1.47 | 105               | 0.58  | 0.86 |
| 2005 | 7          | 0.03  | 0.35 | 18             | 0.64  | 0.83 | 13         | -0.68 | 1.31 | 21             | 0.24  | 0.95 | 12            | -0.03 | 0.75 | 91                | 0.67  | 1.01 |

Table 3. 13-14 Year Old Reading Sample Sizes, Standardized Means, and Standard Deviations, Aggregated Biennially from 1986 - 2005

| Year | Poor White |       |      | Non-Poor White |       |      | Poor Black |       |      | Non-Poor Black |       |      | Poor Hispanic |       |      | Non-Poor Hispanic |       |      |
|------|------------|-------|------|----------------|-------|------|------------|-------|------|----------------|-------|------|---------------|-------|------|-------------------|-------|------|
|      | N          | M     | SD   | N              | M     | SD   | N          | M     | SD   | N              | M     | SD   | N             | M     | SD   | N                 | M     | SD   |
| 1986 | 2          | -1.18 | 1.64 | 2              | -0.15 | 1.49 | 4          | -1.25 | 0.93 | 2              | -1.00 | 0.42 | 2             | -1.85 | 0.36 | 2                 | -0.08 | 0.20 |
| 1988 | 8          | -0.28 | 0.91 | 9              | 0.00  | 1.48 | 21         | -0.74 | 0.95 | 23             | -0.65 | 0.92 | 12            | -0.71 | 1.09 | 23                | -0.14 | 1.11 |
| 1990 | 8          | -0.10 | 0.37 | 23             | -0.43 | 1.08 | 33         | -0.82 | 0.87 | 40             | -0.01 | 0.85 | 9             | -0.73 | 1.55 | 42                | 0.29  | 0.78 |
| 1992 | 18         | -0.02 | 0.96 | 37             | -0.05 | 0.87 | 50         | -0.39 | 0.90 | 45             | -0.25 | 0.89 | 15            | -0.62 | 0.73 | 67                | 0.00  | 1.01 |
| 1994 | 20         | -0.68 | 0.81 | 52             | -0.17 | 1.04 | 68         | -0.64 | 0.96 | 62             | -0.10 | 0.88 | 20            | 0.03  | 0.88 | 110               | 0.28  | 0.93 |
| 1996 | 23         | -0.40 | 1.03 | 63             | 0.00  | 1.01 | 48         | -0.60 | 0.80 | 81             | -0.27 | 0.92 | 23            | -0.07 | 1.21 | 141               | 0.12  | 0.96 |
| 1998 | 23         | -0.65 | 1.33 | 62             | 0.12  | 0.97 | 52         | -0.57 | 0.92 | 71             | -0.32 | 0.98 | 27            | 0.00  | 0.88 | 160               | 0.25  | 0.83 |
| 2000 | 14         | -0.21 | 0.94 | 37             | 0.19  | 0.95 | 31         | -0.69 | 1.01 | 51             | -0.13 | 1.00 | 21            | -0.16 | 1.24 | 131               | 0.24  | 0.91 |
| 2002 | 17         | -0.19 | 1.09 | 55             | 0.32  | 0.84 | 28         | -0.87 | 1.09 | 75             | 0.02  | 1.07 | 21            | -0.10 | 0.83 | 149               | 0.30  | 0.86 |
| 2004 | 19         | -0.73 | 1.50 | 45             | 0.29  | 0.80 | 25         | -0.73 | 0.91 | 51             | -0.22 | 0.80 | 12            | 0.28  | 0.74 | 167               | 0.44  | 0.85 |
| 2005 | 14         | -0.32 | 1.18 | 49             | 0.03  | 0.94 | 31         | -0.61 | 0.93 | 44             | 0.11  | 1.01 | 13            | 0.16  | 0.88 | 151               | 0.54  | 0.78 |

Table 4. 5-6 Year Old Math Sample Sizes, Standardized Means, and Standard Deviations, Aggregated Biennially from 1986 - 2005

| Year | Poor White |       |      | Non-Poor White |       |      | Poor Black |       |      | Non-Poor Black |       |      | Poor Hispanic |       |      | Non-Poor Hispanic |      |      |
|------|------------|-------|------|----------------|-------|------|------------|-------|------|----------------|-------|------|---------------|-------|------|-------------------|------|------|
|      | N          | M     | SD   | N              | M     | SD   | N          | M     | SD   | N              | M     | SD   | N             | M     | SD   | N                 | M    | SD   |
| 1986 | 31         | -0.47 | 1.11 | 50             | -0.05 | 0.78 | 83         | -0.37 | 0.99 | 61             | -0.19 | 0.80 | 62            | 0.00  | 0.82 | 160               | 0.37 | 1.10 |
| 1988 | 34         | -0.58 | 0.94 | 64             | -0.07 | 0.87 | 81         | -0.40 | 0.92 | 89             | 0.01  | 0.94 | 76            | -0.25 | 0.99 | 199               | 0.39 | 1.00 |
| 1990 | 30         | -0.43 | 0.88 | 75             | -0.16 | 0.78 | 62         | -0.24 | 1.11 | 83             | 0.01  | 1.03 | 40            | -0.04 | 0.90 | 211               | 0.22 | 0.96 |
| 1992 | 28         | -0.39 | 0.71 | 76             | -0.06 | 1.02 | 46         | -0.48 | 0.52 | 63             | -0.08 | 1.07 | 24            | -0.17 | 0.98 | 187               | 0.21 | 0.92 |
| 1994 | 18         | -0.51 | 0.92 | 73             | -0.09 | 0.91 | 47         | -0.44 | 1.05 | 72             | -0.21 | 0.85 | 24            | -0.05 | 0.95 | 175               | 0.34 | 0.92 |
| 1996 | 19         | -0.85 | 0.58 | 50             | -0.06 | 1.01 | 39         | -0.46 | 0.72 | 38             | -0.20 | 0.74 | 16            | 0.07  | 1.13 | 190               | 0.31 | 1.06 |
| 1998 | 18         | -0.60 | 0.71 | 39             | -0.22 | 0.92 | 27         | -0.66 | 0.95 | 43             | 0.20  | 0.93 | 13            | -0.37 | 0.72 | 143               | 0.29 | 1.07 |
| 2000 | 3          | -0.95 | 1.00 | 18             | -0.29 | 0.80 | 14         | -0.65 | 1.19 | 20             | -0.60 | 0.71 | 15            | 0.09  | 0.91 | 106               | 0.26 | 1.01 |
| 2002 | 3          | -0.08 | 0.96 | 23             | -0.08 | 0.95 | 9          | -0.50 | 0.64 | 23             | -0.17 | 1.19 | 11            | 0.06  | 0.86 | 83                | 0.04 | 0.97 |
| 2004 | 4          | -0.99 | 0.63 | 19             | -0.24 | 0.72 | 7          | -0.72 | 0.26 | 17             | -0.41 | 0.86 | 1             | 0.03  | --   | 64                | 0.25 | 1.01 |
| 2005 | 3          | -1.24 | 0.82 | 14             | 0.09  | 0.66 | 6          | -0.70 | 0.55 | 16             | -0.49 | 0.58 | 1             | 0.02  | --   | 32                | 0.25 | 1.15 |

Table 5. 9-10 Year Old Math Sample Sizes, Standardized Means, and Standard Deviations, Aggregated Biennially from 1986 - 2005

| Year        | Poor White |       |      | Non-Poor White |       |      | Poor Black |       |      | Non-Poor Black |       |      | Poor Hispanic |       |      | Non-Poor Hispanic |       |      |
|-------------|------------|-------|------|----------------|-------|------|------------|-------|------|----------------|-------|------|---------------|-------|------|-------------------|-------|------|
|             | N          | M     | SD   | N              | M     | SD   | N          | M     | SD   | N              | M     | SD   | N             | M     | SD   | N                 | M     | SD   |
| <b>1986</b> | 13         | -0.61 | 1.13 | 12             | 0.17  | 0.70 | 44         | -0.51 | 0.81 | 33             | -0.24 | 0.61 | 29            | -0.32 | 1.09 | 56                | 0.09  | 0.83 |
| <b>1988</b> | 21         | -0.73 | 0.95 | 30             | -0.24 | 0.76 | 61         | -0.68 | 0.88 | 50             | -0.50 | 0.87 | 39            | -0.21 | 0.97 | 110               | -0.08 | 0.80 |
| <b>1990</b> | 25         | -0.47 | 0.98 | 47             | -0.23 | 0.76 | 54         | -0.67 | 1.10 | 76             | -0.38 | 0.87 | 28            | -0.21 | 0.73 | 135               | 0.08  | 0.87 |
| <b>1992</b> | 30         | -0.63 | 0.84 | 61             | -0.13 | 0.78 | 62         | -0.53 | 0.91 | 84             | -0.28 | 0.79 | 30            | -0.11 | 0.81 | 151               | 0.11  | 0.72 |
| <b>1994</b> | 29         | -0.46 | 0.85 | 72             | -0.11 | 0.75 | 56         | -0.43 | 0.92 | 75             | -0.16 | 0.86 | 37            | -0.03 | 0.89 | 182               | 0.15  | 0.86 |
| <b>1996</b> | 24         | -0.33 | 1.01 | 69             | -0.20 | 0.89 | 43         | -0.58 | 0.92 | 65             | -0.12 | 0.92 | 22            | 0.14  | 1.18 | 168               | 0.29  | 0.87 |
| <b>1998</b> | 24         | -0.35 | 1.06 | 61             | -0.23 | 1.02 | 45         | -0.72 | 1.04 | 72             | -0.18 | 0.99 | 28            | 0.04  | 1.19 | 153               | 0.36  | 0.84 |
| <b>2000</b> | 11         | -0.90 | 0.95 | 28             | 0.41  | 1.13 | 28         | -0.63 | 0.82 | 33             | -0.04 | 0.72 | 21            | 0.44  | 0.97 | 155               | 0.48  | 0.82 |
| <b>2002</b> | 12         | -0.88 | 1.14 | 45             | 0.16  | 0.89 | 24         | -0.75 | 1.17 | 42             | 0.11  | 1.01 | 11            | 0.02  | 0.69 | 137               | 0.66  | 0.97 |
| <b>2004</b> | 5          | -0.25 | 1.58 | 27             | 0.44  | 0.77 | 18         | -0.64 | 1.10 | 30             | -0.30 | 1.02 | 3             | -0.72 | 2.67 | 105               | 0.65  | 0.86 |
| <b>2005</b> | 7          | 0.01  | 1.01 | 18             | 0.38  | 0.76 | 13         | -0.96 | 1.50 | 21             | 0.50  | 1.03 | 12            | 0.32  | 1.12 | 91                | 0.69  | 1.00 |

Table 6. 13-14 Year Old Math Sample Sizes, Standardized Means, and Standard Deviations, Aggregated Biennially from 1986 - 2005

| Year | Poor White |       |      | Non-Poor White |       |      | Poor Black |       |      | Non-Poor Black |       |      | Poor Hispanic |       |      | Non-Poor Hispanic |       |      |
|------|------------|-------|------|----------------|-------|------|------------|-------|------|----------------|-------|------|---------------|-------|------|-------------------|-------|------|
|      | N          | M     | SD   | N              | M     | SD   | N          | M     | SD   | N              | M     | SD   | N             | M     | SD   | N                 | M     | SD   |
| 1986 | 2          | -0.37 | 1.40 | 2              | -0.67 | 0.49 | 4          | -0.82 | 0.94 | 2              | -0.93 | 0.83 | 2             | -0.39 | 0.94 | 2                 | 0.02  | 0.73 |
| 1988 | 8          | -0.72 | 0.91 | 9              | -0.15 | 1.01 | 21         | -1.04 | 0.80 | 23             | -0.77 | 1.07 | 12            | -0.58 | 1.18 | 23                | -0.18 | 1.09 |
| 1990 | 8          | -0.15 | 0.87 | 23             | -0.34 | 0.91 | 33         | -0.72 | 0.75 | 40             | 0.01  | 0.82 | 9             | 0.00  | 1.10 | 42                | 0.33  | 0.85 |
| 1992 | 18         | -0.32 | 0.70 | 37             | -0.37 | 0.87 | 50         | -0.71 | 0.86 | 45             | -0.35 | 0.69 | 15            | -0.52 | 0.98 | 67                | 0.02  | 0.92 |
| 1994 | 20         | -0.70 | 0.66 | 52             | -0.34 | 0.90 | 68         | -0.61 | 0.78 | 62             | -0.26 | 0.78 | 20            | 0.00  | 0.73 | 110               | 0.10  | 0.86 |
| 1996 | 23         | -0.48 | 0.87 | 63             | -0.13 | 0.80 | 48         | -0.69 | 0.83 | 81             | -0.28 | 0.65 | 23            | -0.38 | 1.19 | 141               | 0.19  | 0.86 |
| 1998 | 23         | -0.50 | 0.76 | 62             | -0.20 | 0.98 | 52         | -0.43 | 0.56 | 71             | -0.35 | 0.99 | 27            | 0.12  | 0.76 | 160               | 0.28  | 0.96 |
| 2000 | 14         | -0.13 | 0.91 | 37             | 0.00  | 0.86 | 31         | -0.71 | 1.12 | 51             | -0.22 | 0.94 | 21            | 0.07  | 0.81 | 131               | 0.26  | 1.06 |
| 2002 | 17         | -0.24 | 1.13 | 55             | -0.05 | 0.74 | 28         | -0.75 | 0.93 | 75             | 0.01  | 0.83 | 21            | 0.16  | 0.81 | 149               | 0.43  | 0.81 |
| 2004 | 19         | -0.79 | 1.18 | 45             | 0.23  | 0.84 | 25         | -0.53 | 0.79 | 51             | -0.30 | 0.76 | 12            | 0.42  | 0.71 | 167               | 0.45  | 0.85 |
| 2005 | 14         | -0.58 | 1.25 | 49             | -0.02 | 0.82 | 31         | -0.47 | 0.76 | 44             | -0.03 | 1.26 | 13            | 0.39  | 1.05 | 151               | 0.62  | 0.85 |
